# Supplementary material for: Concomitant Mutations G12D and G13D on the Exon 2 of the KRAS Gene: Two Cases of Women with Colon Adenocarcinoma
Source: MDPI journal article supplement (doi:10.3390/diagnostics11040659), 2021-04-06

# Patient A

**Table S1. Reads coverage**

| Name   | ROI | Bases | ≥100x   | ≥60x    | 0x    | Median | VOI | VOI <100x | VOI <60x |
|--------|-----|-------|---------|---------|-------|--------|-----|-----------|----------|
| NRAS   | 3   | 456   | 100.00% | 100.00% | 0.00% | 5,510  | 51  | 0         | 0        |
| DDR2   | 7   | 1,335 | 100.00% | 100.00% | 0.00% | 7,087  | 0   | 0         | 0        |
| ALK    | 17  | 2,650 | 100.00% | 100.00% | 0.00% | 4,714  | 52  | 0         | 0        |
| ERBB4  | 8   | 1,142 | 100.00% | 100.00% | 0.00% | 7,231  | 0   | 0         | 0        |
| RAF1   | 2   | 8     | 100.00% | 100.00% | 0.00% | 4,938  | 2   | 0         | 0        |
| CTNNB1 | 1   | 230   | 100.00% | 100.00% | 0.00% | 9,094  | 0   | 0         | 0        |
| PIK3CA | 18  | 1,130 | 100.00% | 100.00% | 0.00% | 6,141  | 165 | 0         | 0        |
| FGFR3  | 5   | 800   | 100.00% | 100.00% | 0.00% | 2,970  | 274 | 0         | 0        |
| PDGFRA | 12  | 452   | 100.00% | 100.00% | 0.00% | 7,037  | 52  | 0         | 0        |
| KIT    | 13  | 1,047 | 100.00% | 100.00% | 0.00% | 7,378  | 280 | 0         | 0        |
| FBXW7  | 5   | 878   | 100.00% | 100.00% | 0.00% | 6,215  | 0   | 0         | 0        |
| TERT   | 0   | 0     |         |         |       |        | 0   |           |          |
| ESR1   | 5   | 24    | 100.00% | 100.00% | 0.00% | 7,753  | 11  | 0         | 0        |
| SOD2   | 0   | 0     |         |         |       |        | 0   |           |          |
| EGFR   | 21  | 1,362 | 100.00% | 100.00% | 0.00% | 5,220  | 599 | 0         | 0        |
| MET    | 9   | 2,512 | 100.00% | 100.00% | 0.00% | 8,697  | 0   | 0         | 0        |
| BRAF   | 4   | 270   | 100.00% | 100.00% | 0.00% | 6,018  | 526 | 0         | 0        |
| FGFR1  | 6   | 838   | 100.00% | 100.00% | 0.00% | 4,938  | 0   | 0         | 0        |
| GNAQ   | 2   | 263   | 100.00% | 100.00% | 0.00% | 8,599  | 2   | 0         | 0        |
| NOTCH1 | 2   | 585   | 100.00% | 100.00% | 0.00% | 2,267  | 0   | 0         | 0        |
| FGFR2  | 4   | 458   | 100.00% | 100.00% | 0.00% | 5,673  | 204 | 0         | 0        |
| HRAS   | 3   | 456   | 100.00% | 100.00% | 0.00% | 4,743  | 0   | 0         | 0        |
| GAPDH  | 0   | 0     |         |         |       |        | 0   |           |          |
| KRAS   | 5   | 464   | 100.00% | 100.00% | 0.00% | 7,511  | 162 | 0         | 0        |
| ERBB3  | 8   | 32    | 100.00% | 100.00% | 0.00% | 7,464  | 10  | 0         | 0        |
| FLT3   | 1   | 3     | 100.00% | 100.00% | 0.00% | 5,320  | 1   | 0         | 0        |
| Name   | ROI | Bases | ≥100x   | ≥60x    | 0x    | Median | VOI | VOI <100x | VOI <60x |
| AKT1   | 1   | 131   | 100.00% | 100.00% | 0.00% | 6,564  | 0   | 0         | 0        |
| MAP2K1 | 11  | 1,204 | 100.00% | 100.00% | 0.00% | 5,001  | 3   | 0         | 0        |
| ERBB2  | 14  | 1,433 | 100.00% | 100.00% | 0.00% | 4,788  | 73  | 0         | 0        |
| SMAD4  | 8   | 1,279 | 100.00% | 100.00% | 0.00% | 5,788  | 0   | 0         | 0        |
| STK11  | 4   | 747   | 100.00% | 100.00% | 0.00% | 3,034  | 0   | 0         | 0        |
| GNAI1  | 2   | 263   | 100.00% | 100.00% | 0.00% | 4,091  | 2   | 0         | 0        |
| MAP2K2 | 1   | 213   | 100.00% | 100.00% | 0.00% | 4,858  | 0   | 0         | 0        |

Name: Gene name.

ROI: Number of Regions of Interest, i.e. reportable regions that overlap with the gene.

Bases: Total number of base positions in Regions of Interest that overlap with the gene.

≥100x: Percentage of base positions in Regions of Interest that overlap with the gene for which coverage is equal to or above the significant coverage threshold.

≥60x: Percentage of base positions in Regions of Interest that overlap with the gene for which coverage is equal to or above the minimum coverage threshold.

0x: Percentage of base positions in Regions of Interest that overlap with the gene for which coverage is zero.

Median: Median coverage of base positions in the Regions of Interest that overlap with the gene.

VOI: Total number of Variants of Interest, whether detected or not, that overlap with the gene. The list of Variants of Interest is defined by the analysis pipeline.

VOI <100x: Number of Variants of Interest in the gene for which coverage is below the significant coverage threshold.

VOI <60x: Number of Variants of Interest in the gene for which coverage is below the minimum coverage threshold.

# Patient B

**Table S2. Reads coverage**

| Name   | ROI | Bases | ≥100x   | ≥60x    | 0x    | Median | VOI | VOI <100x | VOI <60x |
|--------|-----|-------|---------|---------|-------|--------|-----|-----------|----------|
| NRAS   | 3   | 456   | 100.00% | 100.00% | 0.00% | 1,628  | 51  | 0         | 0        |
| DDR2   | 7   | 1,335 | 100.00% | 100.00% | 0.00% | 2,201  | 0   | 0         | 0        |
| ALK    | 17  | 2,650 | 100.00% | 100.00% | 0.00% | 1,602  | 52  | 0         | 0        |
| ERBB4  | 8   | 1,142 | 100.00% | 100.00% | 0.00% | 2,534  | 0   | 0         | 0        |
| RAF1   | 2   | 8     | 100.00% | 100.00% | 0.00% | 1,056  | 2   | 0         | 0        |
| CTNNB1 | 1   | 230   | 100.00% | 100.00% | 0.00% | 3,005  | 0   | 0         | 0        |
| PIK3CA | 18  | 1,130 | 100.00% | 100.00% | 0.00% | 1,733  | 165 | 0         | 0        |
| FGFR3  | 5   | 800   | 100.00% | 100.00% | 0.00% | 1,071  | 274 | 0         | 0        |
| PDGFRA | 12  | 452   | 100.00% | 100.00% | 0.00% | 2,169  | 52  | 0         | 0        |
| KIT    | 13  | 1,047 | 100.00% | 100.00% | 0.00% | 2,028  | 280 | 0         | 0        |
| FBXW7  | 5   | 878   | 100.00% | 100.00% | 0.00% | 2,169  | 0   | 0         | 0        |
| TERT   | 0   | 0     |         |         |       |        | 0   |           |          |
| ESR1   | 5   | 24    | 100.00% | 100.00% | 0.00% | 2,392  | 11  | 0         | 0        |
| SOD2   | 0   | 0     |         |         |       |        | 0   |           |          |
| EGFR   | 21  | 1,362 | 100.00% | 100.00% | 0.00% | 2,057  | 599 | 0         | 0        |
| MET    | 9   | 2,512 | 100.00% | 100.00% | 0.00% | 2,960  | 0   | 0         | 0        |
| BRAF   | 4   | 270   | 100.00% | 100.00% | 0.00% | 2,136  | 526 | 0         | 0        |
| FGFR1  | 6   | 838   | 100.00% | 100.00% | 0.00% | 1,677  | 0   | 0         | 0        |
| GNAQ   | 2   | 263   | 100.00% | 100.00% | 0.00% | 1,924  | 2   | 0         | 0        |
| NOTCH1 | 2   | 585   | 100.00% | 100.00% | 0.00% | 947    | 0   | 0         | 0        |
| FGFR2  | 4   | 458   | 100.00% | 100.00% | 0.00% | 1,340  | 204 | 0         | 0        |
| HRAS   | 3   | 456   | 100.00% | 100.00% | 0.00% | 1,939  | 0   | 0         | 0        |
| GAPDH  | 0   | 0     |         |         |       |        | 0   |           |          |
| KRAS   | 5   | 464   | 100.00% | 100.00% | 0.00% | 2,329  | 162 | 0         | 0        |
| ERBB3  | 8   | 32    | 100.00% | 100.00% | 0.00% | 1,397  | 10  | 0         | 0        |
| FLT3   | 1   | 3     | 100.00% | 100.00% | 0.00% | 1,655  | 1   | 0         | 0        |
| Name   | ROI | Bases | ≥100x   | ≥60x    | 0x    | Median | VOI | VOI <100x | VOI <60x |
| AKT1   | 1   | 131   | 100.00% | 100.00% | 0.00% | 1,717  | 0   | 0         | 0        |
| MAP2K1 | 11  | 1,204 | 100.00% | 100.00% | 0.00% | 1,600  | 3   | 0         | 0        |
| ERBB2  | 14  | 1,433 | 100.00% | 100.00% | 0.00% | 1,328  | 73  | 0         | 0        |
| SMAD4  | 8   | 1,279 | 100.00% | 100.00% | 0.00% | 1,911  | 0   | 0         | 0        |
| STK11  | 4   | 747   | 100.00% | 100.00% | 0.00% | 1,270  | 0   | 0         | 0        |
| GNA11  | 2   | 263   | 100.00% | 100.00% | 0.00% | 1,188  | 2   | 0         | 0        |
| MAP2K2 | 1   | 213   | 100.00% | 100.00% | 0.00% | 1,090  | 0   | 0         | 0        |

Name: Gene name.

ROI: Number of Regions of Interest, i.e. reportable regions that overlap with the gene.

Bases: Total number of base positions in Regions of Interest that overlap with the gene.

≥100x: Percentage of base positions in Regions of Interest that overlap with the gene for which coverage is equal to or above the significant coverage threshold.

≥60x: Percentage of base positions in Regions of Interest that overlap with the gene for which coverage is equal to or above the minimum coverage threshold.

0x: Percentage of base positions in Regions of Interest that overlap with the gene for which coverage is zero.

Median: Median coverage of base positions in the Regions of Interest that overlap with the gene.

VOI: Total number of Variants of Interest, whether detected or not, that overlap with the gene. The list of Variants of Interest is defined by the analysis pipeline.

VOI <100x: Number of Variants of Interest in the gene for which coverage is below the significant coverage threshold.

VOI <60x: Number of Variants of Interest in the gene for which coverage is below the minimum coverage threshold.

# Supplementary Figure S1. Average Quality scores of UMI reads

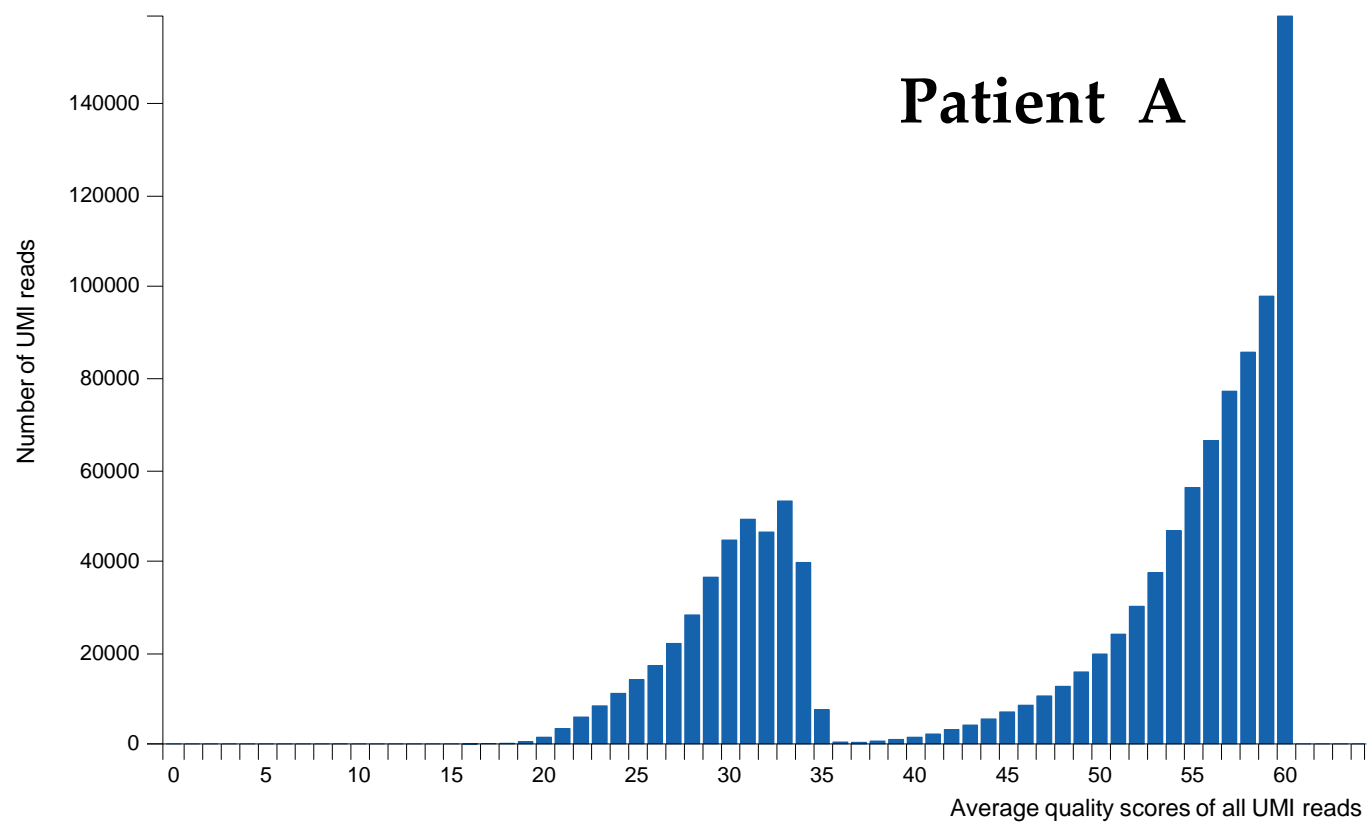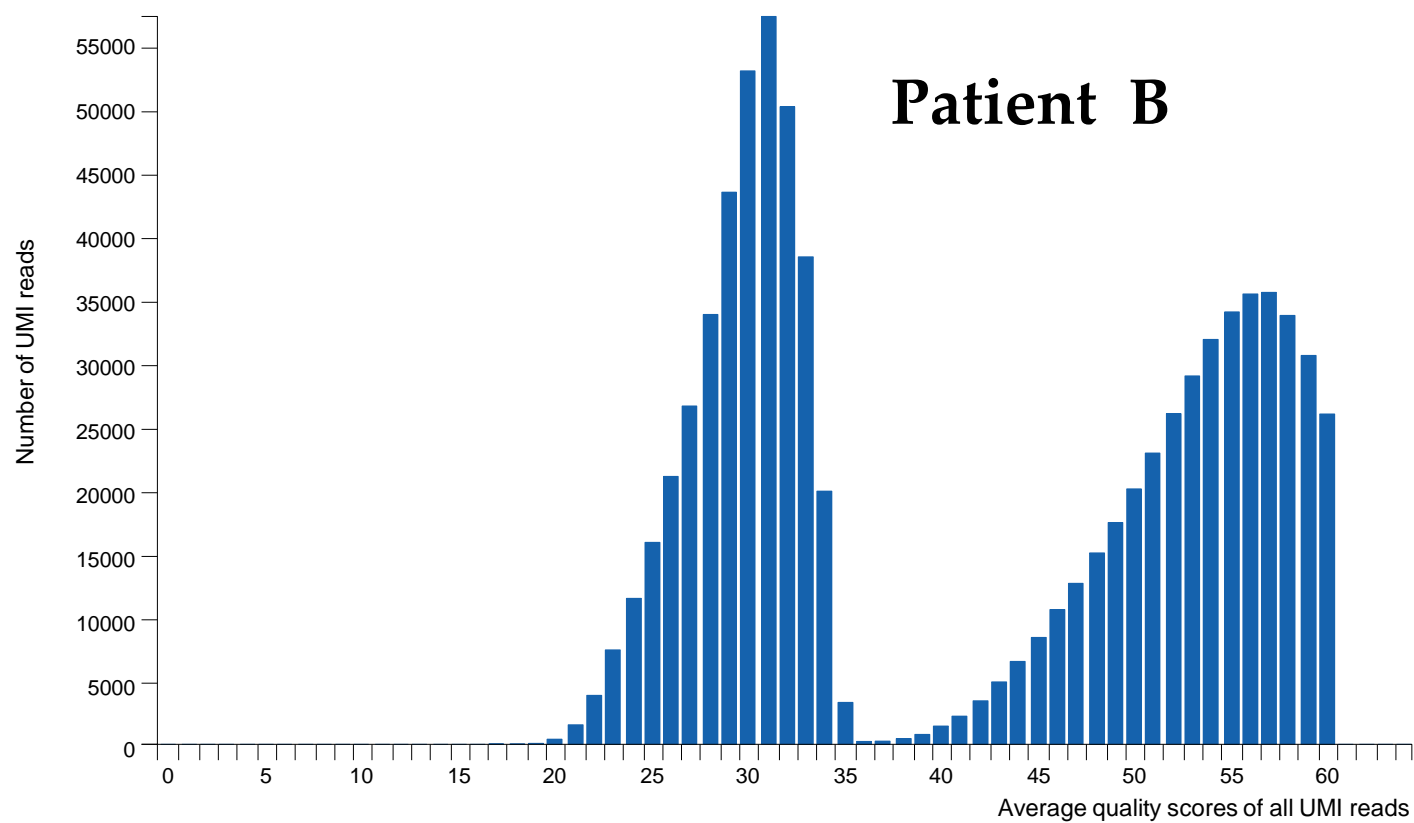

Supplement: s1 [file s1]
